# Supplementary material
Source: publisher figshare collection journal article supplement (https://sage.figshare.com/ndownloader/files/14464499)
Supplement: Supplementary file 1 [file 14464499]

Supplemental Table 2. Fish otolith age and length data for 12 brown bullhead collections: ANAC (Anacostia – CSX), ANABL (Anacostia – Bladensburg), PISC (Piscataway), DYKE (Dyke Marsh), TUCK (Tuckahoe), and CHES (Chester).

| **Collection** | **N** | **Mean Age years ±SD** | **Min Age (yrs)** | **Max Age**  **(yrs)** | **Mean Length**  **mm±SD** | **Min length**  **(mm)** | **Max**  **Length**  **(mm)** |
| --- | --- | --- | --- | --- | --- | --- | --- |
| ANAC14 | 47 | 4.7±1.6 | 3 | 9 | 298±23 | 255 | 341 |
| ANAC15 | 59 | 5.1±1.3 | 3 | 10 | 312±19 | 271 | 345 |
| ANAC16 | 50 | 5.7±0.8 | 3 | 8 | 318±21 | 264 | 358 |
| ANABL14 | 50 | 4.1±1.2 | 3 | 9 | 306±18 | 273 | 350 |
| ANABL15 | 47 | 5.1±0.9 | 3 | 10 | 307±30 | 261 | 432 |
| ANABL16 | 50 | 5.6±1.4 | 2 | 10 | 322±25 | 255 | 359 |
| PISC14 | 49 | 5.3±2.4 | 2 | 11 | 297±16 | 260 | 330 |
| PISC15 | 47 | 4.9±2.3 | 2 | 14 | 292±17 | 255 | 332 |
| PISC16 | 53 | 5.5±1.8 | 2 | 12 | 298±19 | 251 | 328 |
| DYKE16 | 48 | 4.8±2.0 | 2 | 10 | 298±21 | 255 | 338 |
| TUCK15 | 34 | 4.3±0.6 | 3 | 6 | 266±12 | 253 | 290 |
| CHES10 | 40 | 4.8±0.7 | 2 | 5 | 264±11 | 251 | 301 |
